# Supplementary material for: Novel Prediction Method Applied to Wound Age Estimation: Developing a Stacking Ensemble Model to Improve Predictive Performance Based on Multi-mRNA
Source: MDPI journal article supplement (doi:10.3390/diagnostics13030395), 2023-01-20
Supplement: s1 [file s1]

## Five optimal hyperparameter combinations of machine learning models

**Random Forest Classifier:** bootstrap=True, ccp\_alpha=0.0, class\_weight=None, criterion='gini', max\_depth=80, max\_features='auto', max\_leaf\_nodes=None, max\_samples=None, min\_impurity\_decrease=0.0, min\_impurity\_split=None, min\_samples\_leaf=1, verbose=0, min\_samples\_split=2, min\_weight\_fraction\_leaf=0.0, n\_estimators=200, n\_jobs=None, oob\_score=False, random\_state=0, warm\_start=False

**Support Vector Machine:** C=10, break\_ties=False, cache\_size=200, class\_weight=None, coef0=0.0, decision\_function\_shape='ovr', degree=5, gamma=1, kernel='rbf', max\_iter=-1, probability=True, random\_state=3, shrinking=True, tol=0.001, verbose=False

**Multilayer Perceptron Classifier:** activation='relu', alpha=0.0001, batch\_size='auto', beta\_1=0.9, beta\_2=0.999, early\_stopping=False, epsilon=1e-08, hidden\_layer\_sizes=(64, 128, 256), learning\_rate='constant', learning\_rate\_init=0.001, max\_fun=15000, max\_iter=200, momentum=0.9, n\_iter\_no\_change=10, nesterovs\_momentum=True, power\_t=0.5, tol=0.0001, random\_state=4, shuffle=True, solver='adam', validation\_fraction=0.1, verbose=False, warm\_start=False

**Gradient Boosting:** ccp\_alpha=0.0, criterion='friedman\_mse', init=None, learning\_rate=0.1, loss='deviance', max\_depth=5, max\_features=None, max\_leaf\_nodes=None, min\_impurity\_decrease=0.0, min\_impurity\_split=None, min\_samples\_leaf=1, min\_samples\_split=2, tol=0.0001, min\_weight\_fraction\_leaf=0.0, n\_estimators=50, n\_iter\_no\_change=None, presort='deprecated', random\_state=3, subsample=0.5, validation\_fraction=0.1, verbose=0, warm\_start=False

**Stochastic Gradient Descent:** alpha=0.0001, average=False, class\_weight=None, power\_t=0.5, early\_stopping=False, epsilon=0.1, eta0=0.0, fit\_intercept=True, l1\_ratio=0.15, loss='log', learning\_rate='optimal', max\_iter=50, n\_iter\_no\_change=9, n\_jobs=None, warm\_start=False, penalty='l2', random\_state=0, shuffle=True, tol=0.001, validation\_fraction=0.1, verbose=0
