# Supplementary material for: Novel Prediction Method Applied to Wound Age Estimation: Developing a Stacking Ensemble Model to Improve Predictive Performance Based on Multi-mRNA
Source: MDPI journal article supplement (doi:10.3390/diagnostics13030395), 2023-01-20
Supplement: s1 [file s1]

**Table S1 Primers and probes used for RT-qPCR**

| Gene symbol | GenBank accession no. | Nucleotide sequence             | Size of products (bp) | Efficiency (%) |
|-------------|-----------------------|---------------------------------|-----------------------|----------------|
| RPL13       | NM_031101.1           | F5'-TCGTGAGGTGCCCTACAGTTAG-3'   | 107                   | 100.4          |
|             |                       | P5'-CACACCAAGGTCCGGGCTGGCAG-3'  |                       |                |
|             |                       | R5'-GGTGCGTGCCATTTTCTTGTG-3'    |                       |                |
| RPL32       | NM_013226.2           | F5'-ATCTGGCCCTTGAATCTTCTCC-3'   | 115                   | 105.2          |
|             |                       | P5'-TGTCGATGCCTCTGGGTTTCCGCC-3' |                       |                |
|             |                       | R5'-AGAGGACCAAGAAGTTCATCAGG-3'  |                       |                |
| Rae1        | NM_001033708          | F5'-AAGCTGAAGACCTCAGAGCAG-3'    | 119                   | 97.9           |
|             |                       | P5'-CCGTGGCAGCGTGTGGCTTCAACC-3' |                       |                |
|             |                       | R5'-TTATAAAACTCATGCCCTTGGAC-3'  |                       |                |
| Ier3        | NM_212505             | F5'-CGTGCGTCCGAACACTTCTC-3'     | 100                   | 100.4          |
|             |                       | P5'-CGAAAACGCAGCCGACGGGTGCTC-3' |                       |                |
|             |                       | R5'-AATGTTGGGTTCCTCGGTTGG-3'    |                       |                |
| Leprot      | NM_020099             | F5'-GGGATTGTTGTTTCTGCCTTTGG-3'  | 120                   | 100.0          |
|             |                       | P5'-TGCCAGCCAGCACAAGACCACAGG-3' |                       |                |
|             |                       | R5'-GCCTTGGATCGTGAGGAAAATAAC-3' |                       |                |
| Impact      | NM_001012235          | F5'-AAGGTTCTTGCCAAGTTGTATGAG-3' | 128                   | 99.7           |
|             |                       | P5'-TCGCCAGTGCCACCCACAACATCT-3' |                       |                |
|             |                       | R5'-GCTGTTTCTCCATCATCTTCGG-3'   |                       |                |
| Asb5        | NM_001044247          | F5'-GGTCGTCTTCTTGCTCTGAGG-3'    | 138                   | 99.8           |
|             |                       | P5'-CCACATGGTCACCCAGGCAGGCTT-3' |                       |                |
|             |                       | R5'-TCCAGCTTCCAGGAGAGTCC-3'     |                       |                |
| Sc65        | NM_021581             | F5'-GGAGATGAGTCCCTCACTGATC-3'   | 144                   | 99.5           |
|             |                       | P5'-CCGCTCCATGTGTTCTGTGCTGCT-3' |                       |                |
|             |                       | R5'-AGCAAAGACGGTCATATAATCAGC-3' |                       |                |
| Myg1        | NM_001005545          | F5'-ACCTCGCAACAACCTCATGG-3'     | 133                   | 93.7           |
|             |                       | P5'-CGAATCGGGACGCACAACGGCAC-3'  |                       |                |
|             |                       | R5'-CCGAGTCCGCACAATCTCTG-3'     |                       |                |
| Dennd 5a    | NM_001107546          | F5'-TACCATCCGTCAGCCCAAAC-3'     | 129                   | 100.3          |
|             |                       | P5'-CCTGTCTCCCTCGGTCATTGCCCA-3' |                       |                |
|             |                       | R5'-CCCATCTTCTCTACCAGCATCC-3'   |                       |                |
| Slfn3/4     | NM_053687             | F5'-AAAGGCCCTCTTCAGTCAAGC-3'    | 150                   | 104.4          |
|             |                       | P5'-CTGCCACACAGTCCCCGTAGCTGC-3' |                       |                |
|             |                       | R5'-TGAGAACAGTTTCCCGCAGAG-3'    |                       |                |
